# Supplementary material for: Production of red yeast rice rich in monacolin K by variable temperature solid fermentation of Monascus purpureus
Source: Royal Society of Chemistry journal article supplement (doi:10.1039/d3ra04374f), 2023-01-01
Supplement: d3ra04374f1.pdf [file d3ra04374f1.pdf]

## Supplemental materials

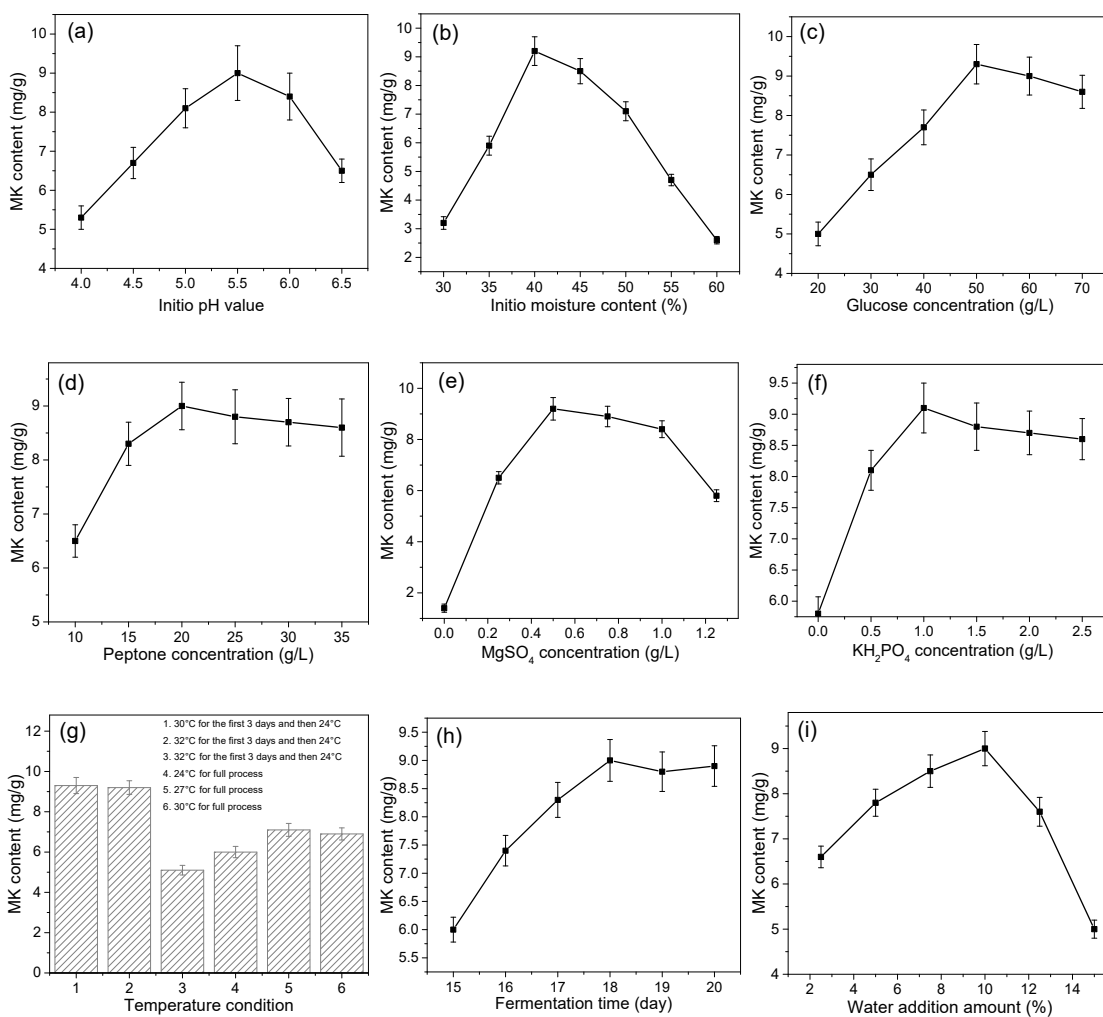

**Figure S1.** Influence of various factors on MK content in red yeast rice: initial pH value (a), initial moisture content (b), glucose (c), peptone (d),  $\text{MgSO}_4$  (e) and  $\text{KH}_2\text{PO}_4$  (f) concentration, fermentation temperature (g), fermentation time (h) and amount of additional water added (i)

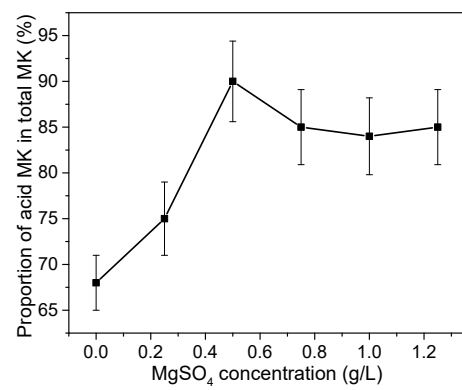

**Figure S2.** Effect of  $\text{MgSO}_4$  concentration on the proportion of acid MK out of total MK in red yeast rice

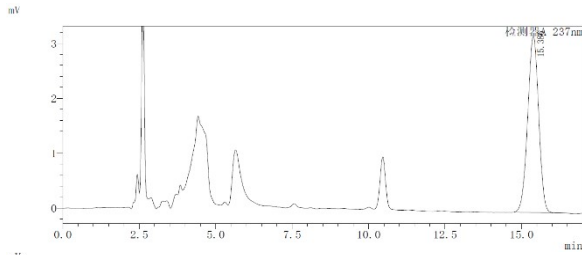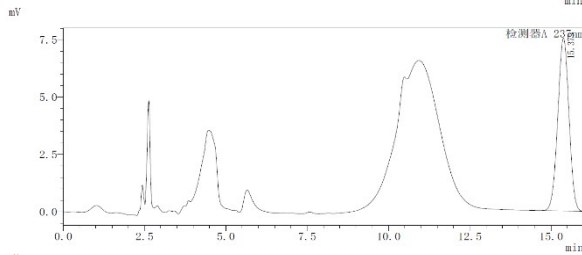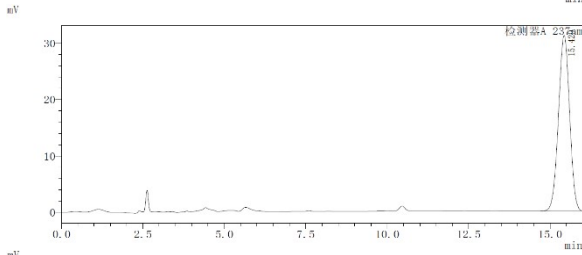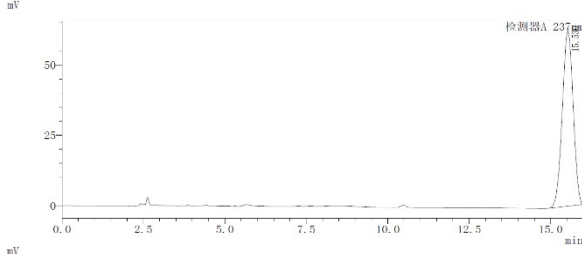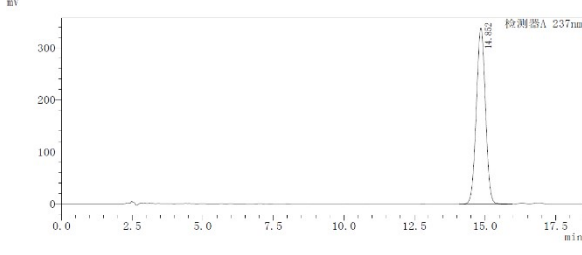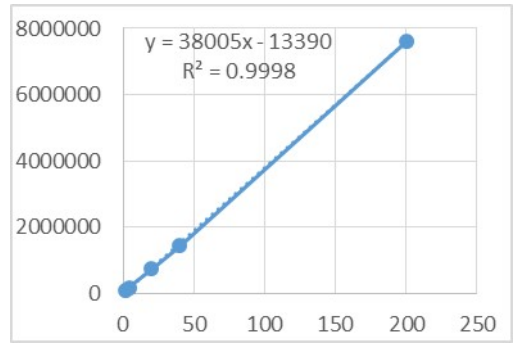

| Concentration (mg/L) | Area    | Hight  |
|----------------------|---------|--------|
| 2                    | 80161   | 3213   |
| 4                    | 180671  | 7544   |
| 20                   | 740406  | 31152  |
| 40                   | 1440681 | 62201  |
| 200                  | 7600410 | 338672 |

Figure S3. HPLC chromatograms and standard curves of acidic MK standard substance

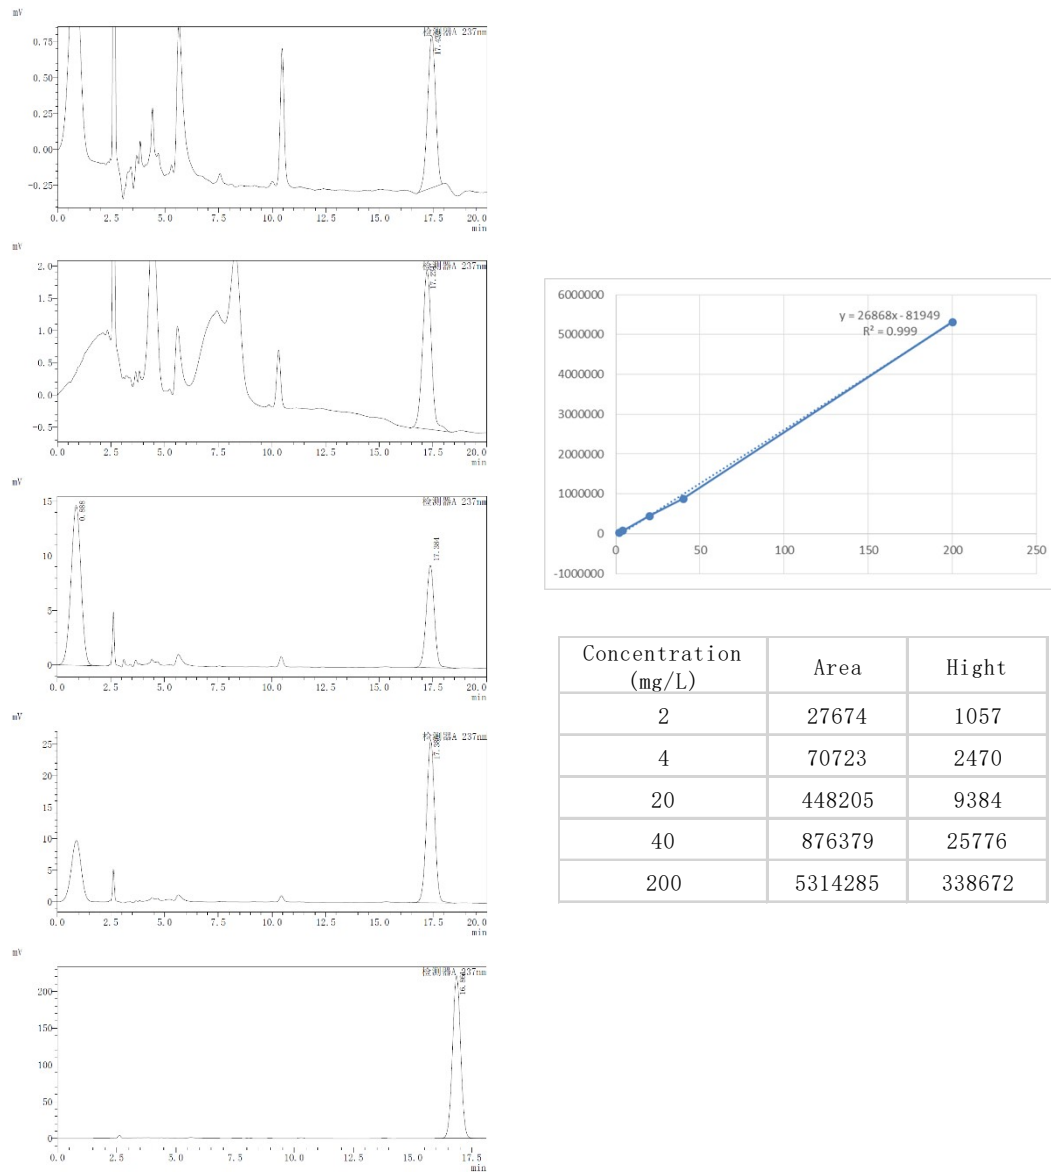

Figure S4. HPLC chromatograms and standard curves of lactone MK standard substance

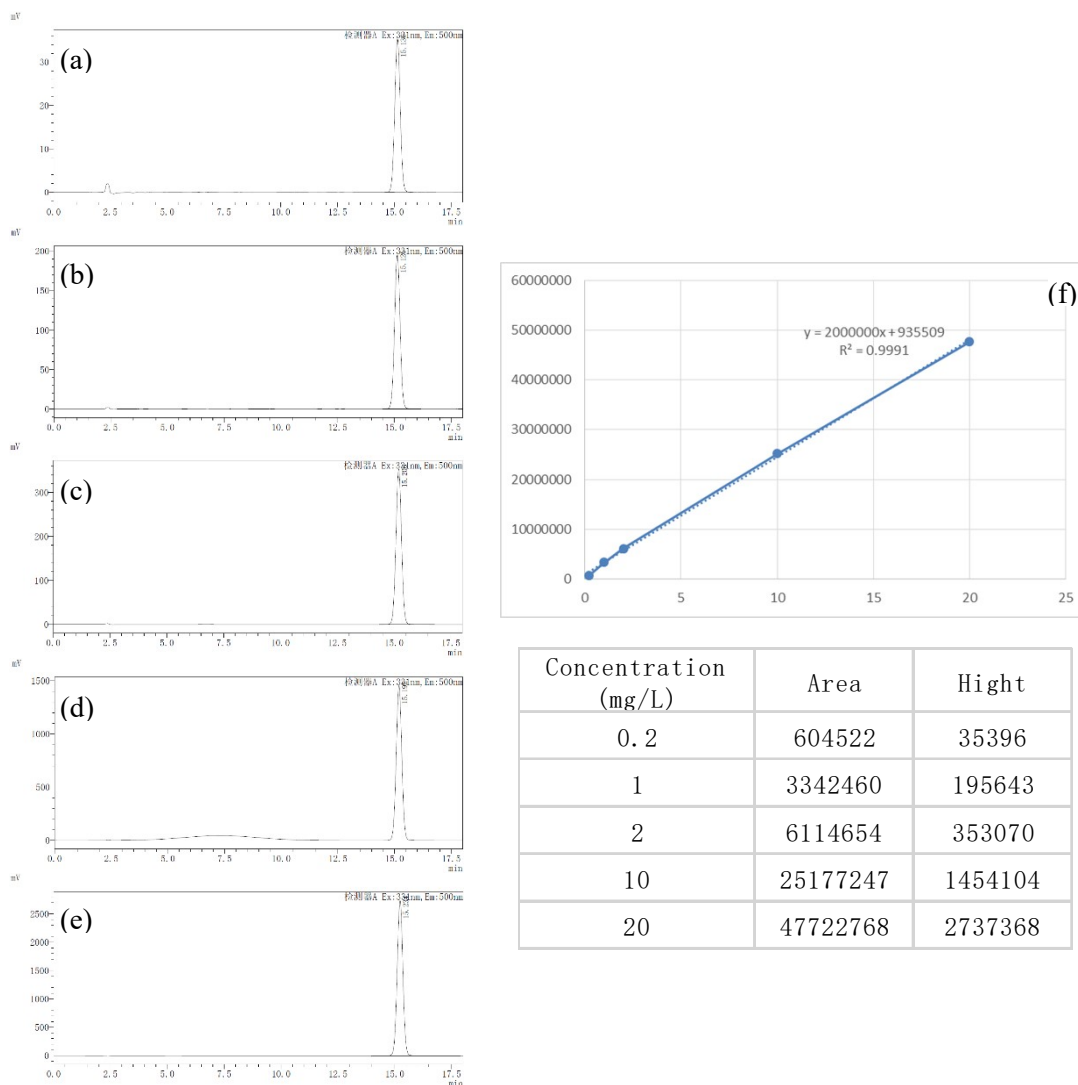

Figure S6. HPLC chromatograms (a: 0.2 mg/L, b: 1 mg/L, c: 2 mg/L, d: 10 mg/L, e: 20 mg/L) and standard curves (f) of citrinin standard substance

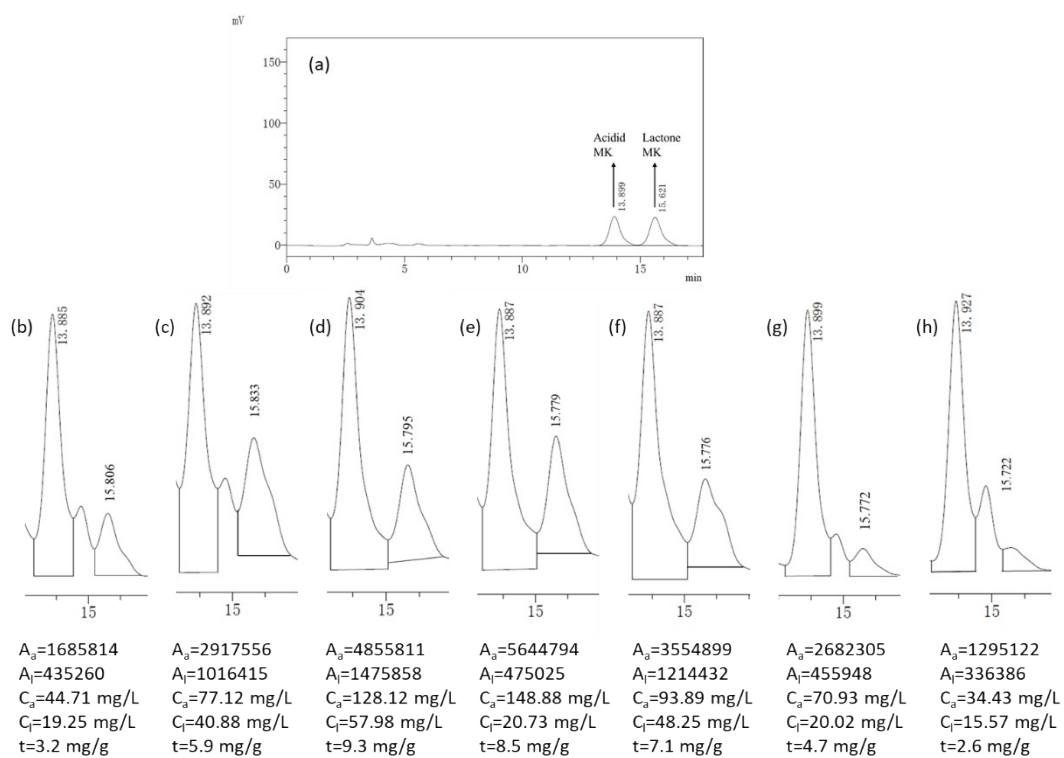

Figure S5. HPLC chromatograms of MK standard substance (a, Acid and Lactone type), and fermentation products MK for different initial moisture content (%): 30 (b), 35 (c), 40 (d), 45 (e), 50 (f), 55 (g) and 60 (h). Where A is peak area, t (mg/g) is the total mass of MK (acid form and lactone form) per gram of dry red yeast rice, and c is the MK concentration in the extract (mg/L).

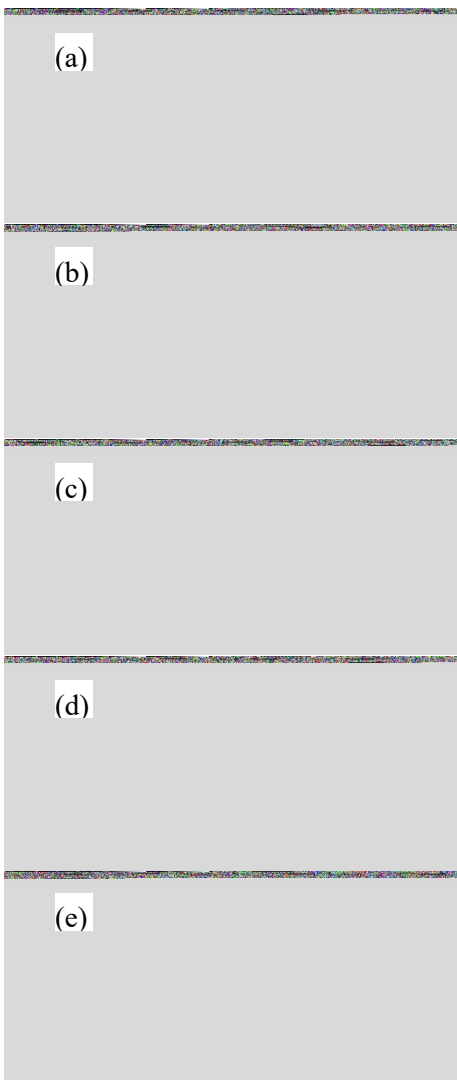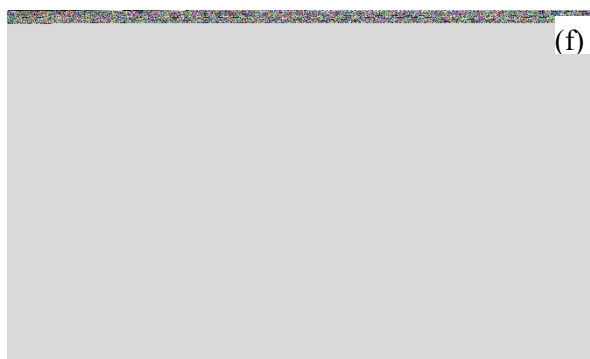

| Concentration<br>(mg/L) | Area     | Hight   |
|-------------------------|----------|---------|
| 0.2                     | 604522   | 35396   |
| 1                       | 3342460  | 195643  |
| 2                       | 6114654  | 353070  |
| 10                      | 25177247 | 1454104 |
| 20                      | 47722768 | 2737368 |

Figure S6. HPLC chromatograms (a: 0.2 mg/L, b: 1 mg/L, c: 2 mg/L, d: 10 mg/L, e: 20 mg/L) and standard curves (f) of citrinin standard substance

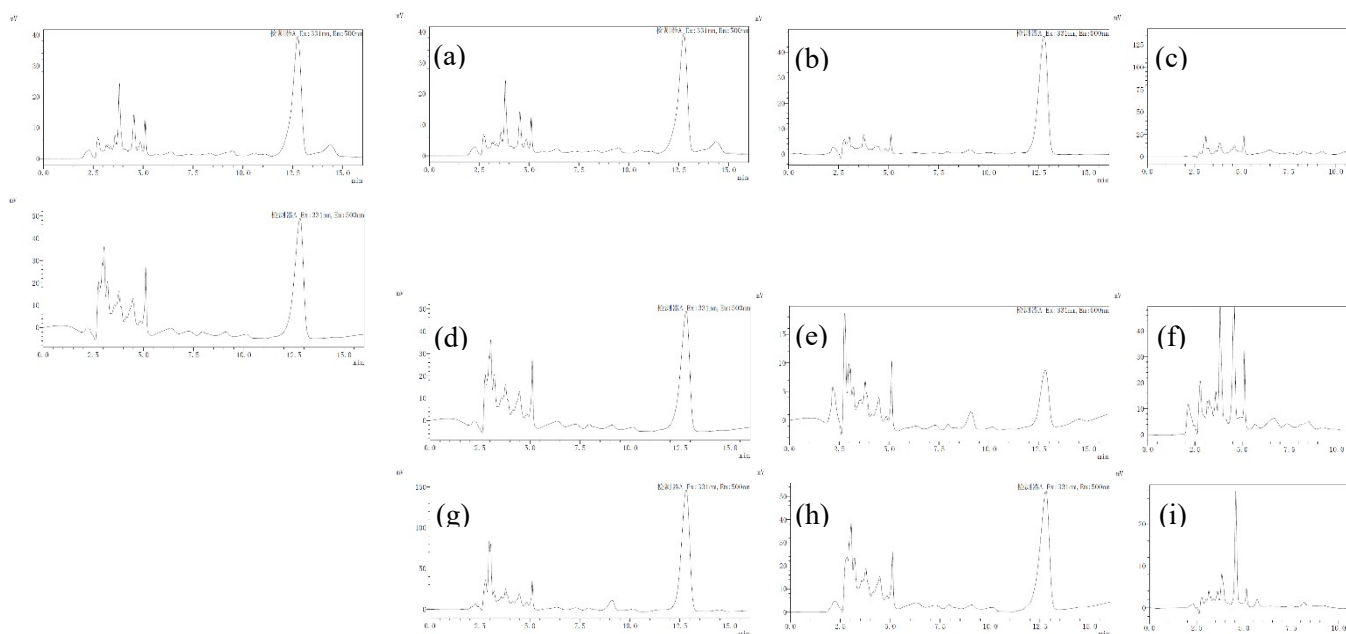

Figure S7. HPLC chromatograms of citrinin in products under various single factor experimental optimization conditions: initial pH value 5.5 (a), initial moisture content 40% w/w (b), glucose 50 g/L (c), peptone 20 g/L (d),  $\text{MgSO}_4$  0.5 g/L (e),  $\text{KH}_2\text{PO}_4$  1 g/L (f), variable temperature fermentation (30 °C for the first 3 days and then 24 °C for 15 days, g), total fermentation time of 18 days (h), and additional water added at day 4 at 10% w/w (i)
